SUMMER 2020 | VOLUME 18 | NUMBER 3

# Focus

The Journal of Lifelong Learning in Psychiatry

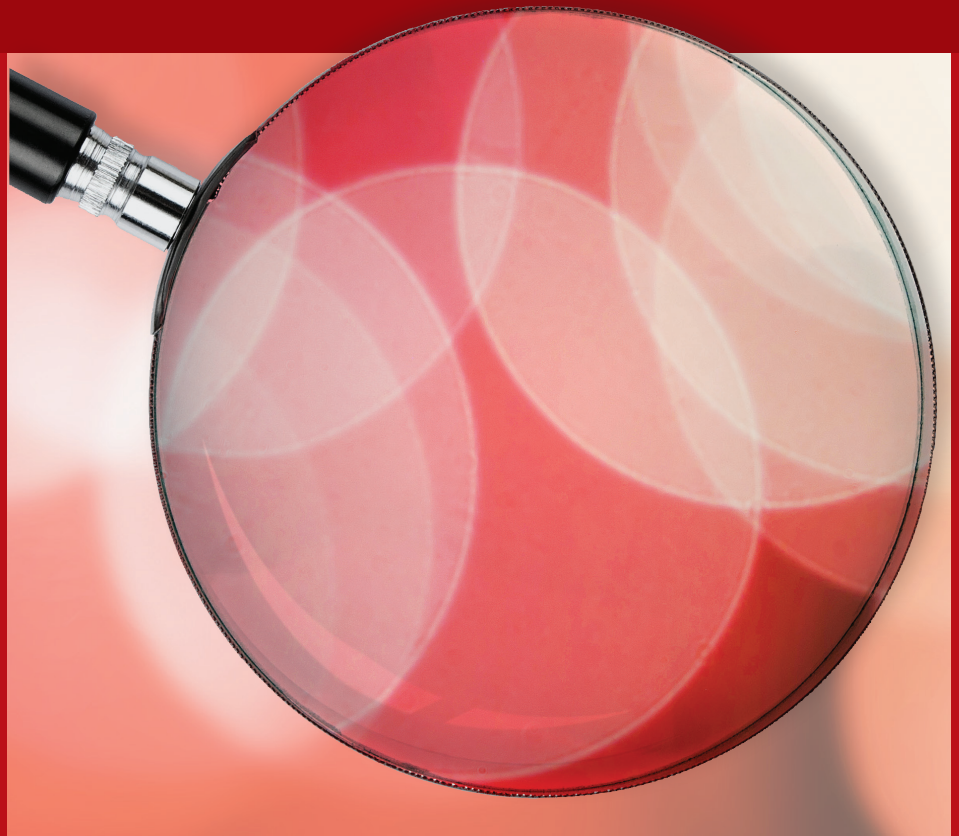

## Psychotherapeutic Engagements With LGBTQ+ Patients and Their Families

Guest Editor: Jack Drescher, M.D.

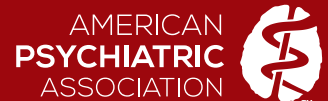

[focus.psychiatryonline.org](http://focus.psychiatryonline.org)
