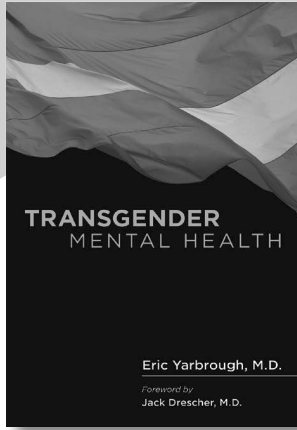

## Transgender Mental Health

Eric Yarbrough, M.D.

This book is designed to educate clinicians on how to address the basic needs of the TGNC community, and thus increase access to mental health care for TGNC individuals, which has been sorely lacking to this point.

Four sections address topics such as the history of the TGNC experience, mental health factors particular to the TGNC community, physical health—including hormones—of TGNC individuals, and gender-affirming surgical procedures, as well as nonsurgical interventions. Summarizing key points and review questions are included at the end of each chapter.

Relevant for a range of mental health professionals, *Transgender Mental Health* is a simple yet thorough primer on the complex topic of gender diversity.

2018 • 339 pages • ISBN 978-1-61537-113-6 • Paperback • \$55.00 • Item #37113

2018 • 339 pages • ISBN 978-1-61537-189-1 • eBook • \$44.00 • Item #37189

## Pocket Guide to LGBTQ Mental Health Understanding the Spectrum of Gender and Sexuality

Edited by Petros Levounis, M.D., M.A., and Eric Yarbrough, M.D.

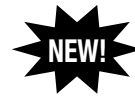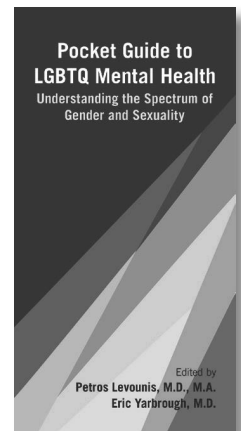

This title reflects sweeping changes in our understanding of gender and sexuality over the last two decades. The book aims to help clinicians, patients, parents, and administrators master the fundamentals of sexual orientation and gender identity. Each chapter begins with the psychological and cultural context of a particular facet of human sexuality, including an exploration of its history and terminology, then proceeds to describe issues and challenges currently faced by people who embrace these identities. In addition, the book addresses common themes that emerge in counseling and psychotherapy with LGBTQ2IAPA people.

Practical and written the *Guide* gives mental health clinicians the tools to understand, relate to, and care for patients of diverse gender identities and sexual orientations.

2020 • 214 pages • ISBN 978-1-61537-275-1 • Paperback • \$58.00 • Item #37275

2020 • 214 pages • ISBN 978-1-61537-310-9 • eBook • \$46.50 • Item #37310

## The LGBT Casebook

Edited by Petros Levounis, M.D., M.A., Jack Drescher, M.D., and Mary Barber, M.D.

2014 Society of Sex Therapy and Research Health Professional Book Award Winner!

*The LGBT Casebook* provides a general overview and roadmap for clinicians new to treating LGBT individuals, and it deepens and updates knowledge for those already seeing these patients in their practices. The book is a collection of case studies of patients with a DSM diagnosis, followed by the case author's insights into how he or she helped a particular patient work through them. By leading the reader through mental health issues within the context of LGBT lives, the book helps mental health professionals better address the unique needs of the LGBT community during both assessment and treatment.

2012 • 324 pages • ISBN 978-1-58562-421-8 • Paperback • \$70.00 • Item #62421

2012 • 324 pages • ISBN 978-1-58562-959-6 • eBook • \$56.00 • Item #62959

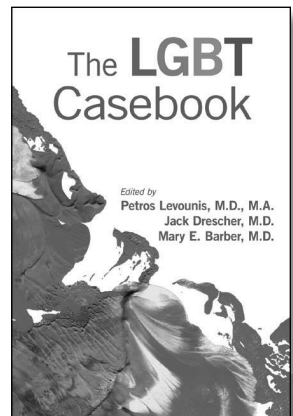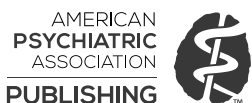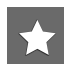

20% Discount for American Psychiatric Association Members

25% Discount for APA Resident-Fellow Members

ORDER @ [www.appi.org](http://www.appi.org) | Email: [appi@psych.org](mailto:appi@psych.org) | Toll Free: 1-800-368-5777

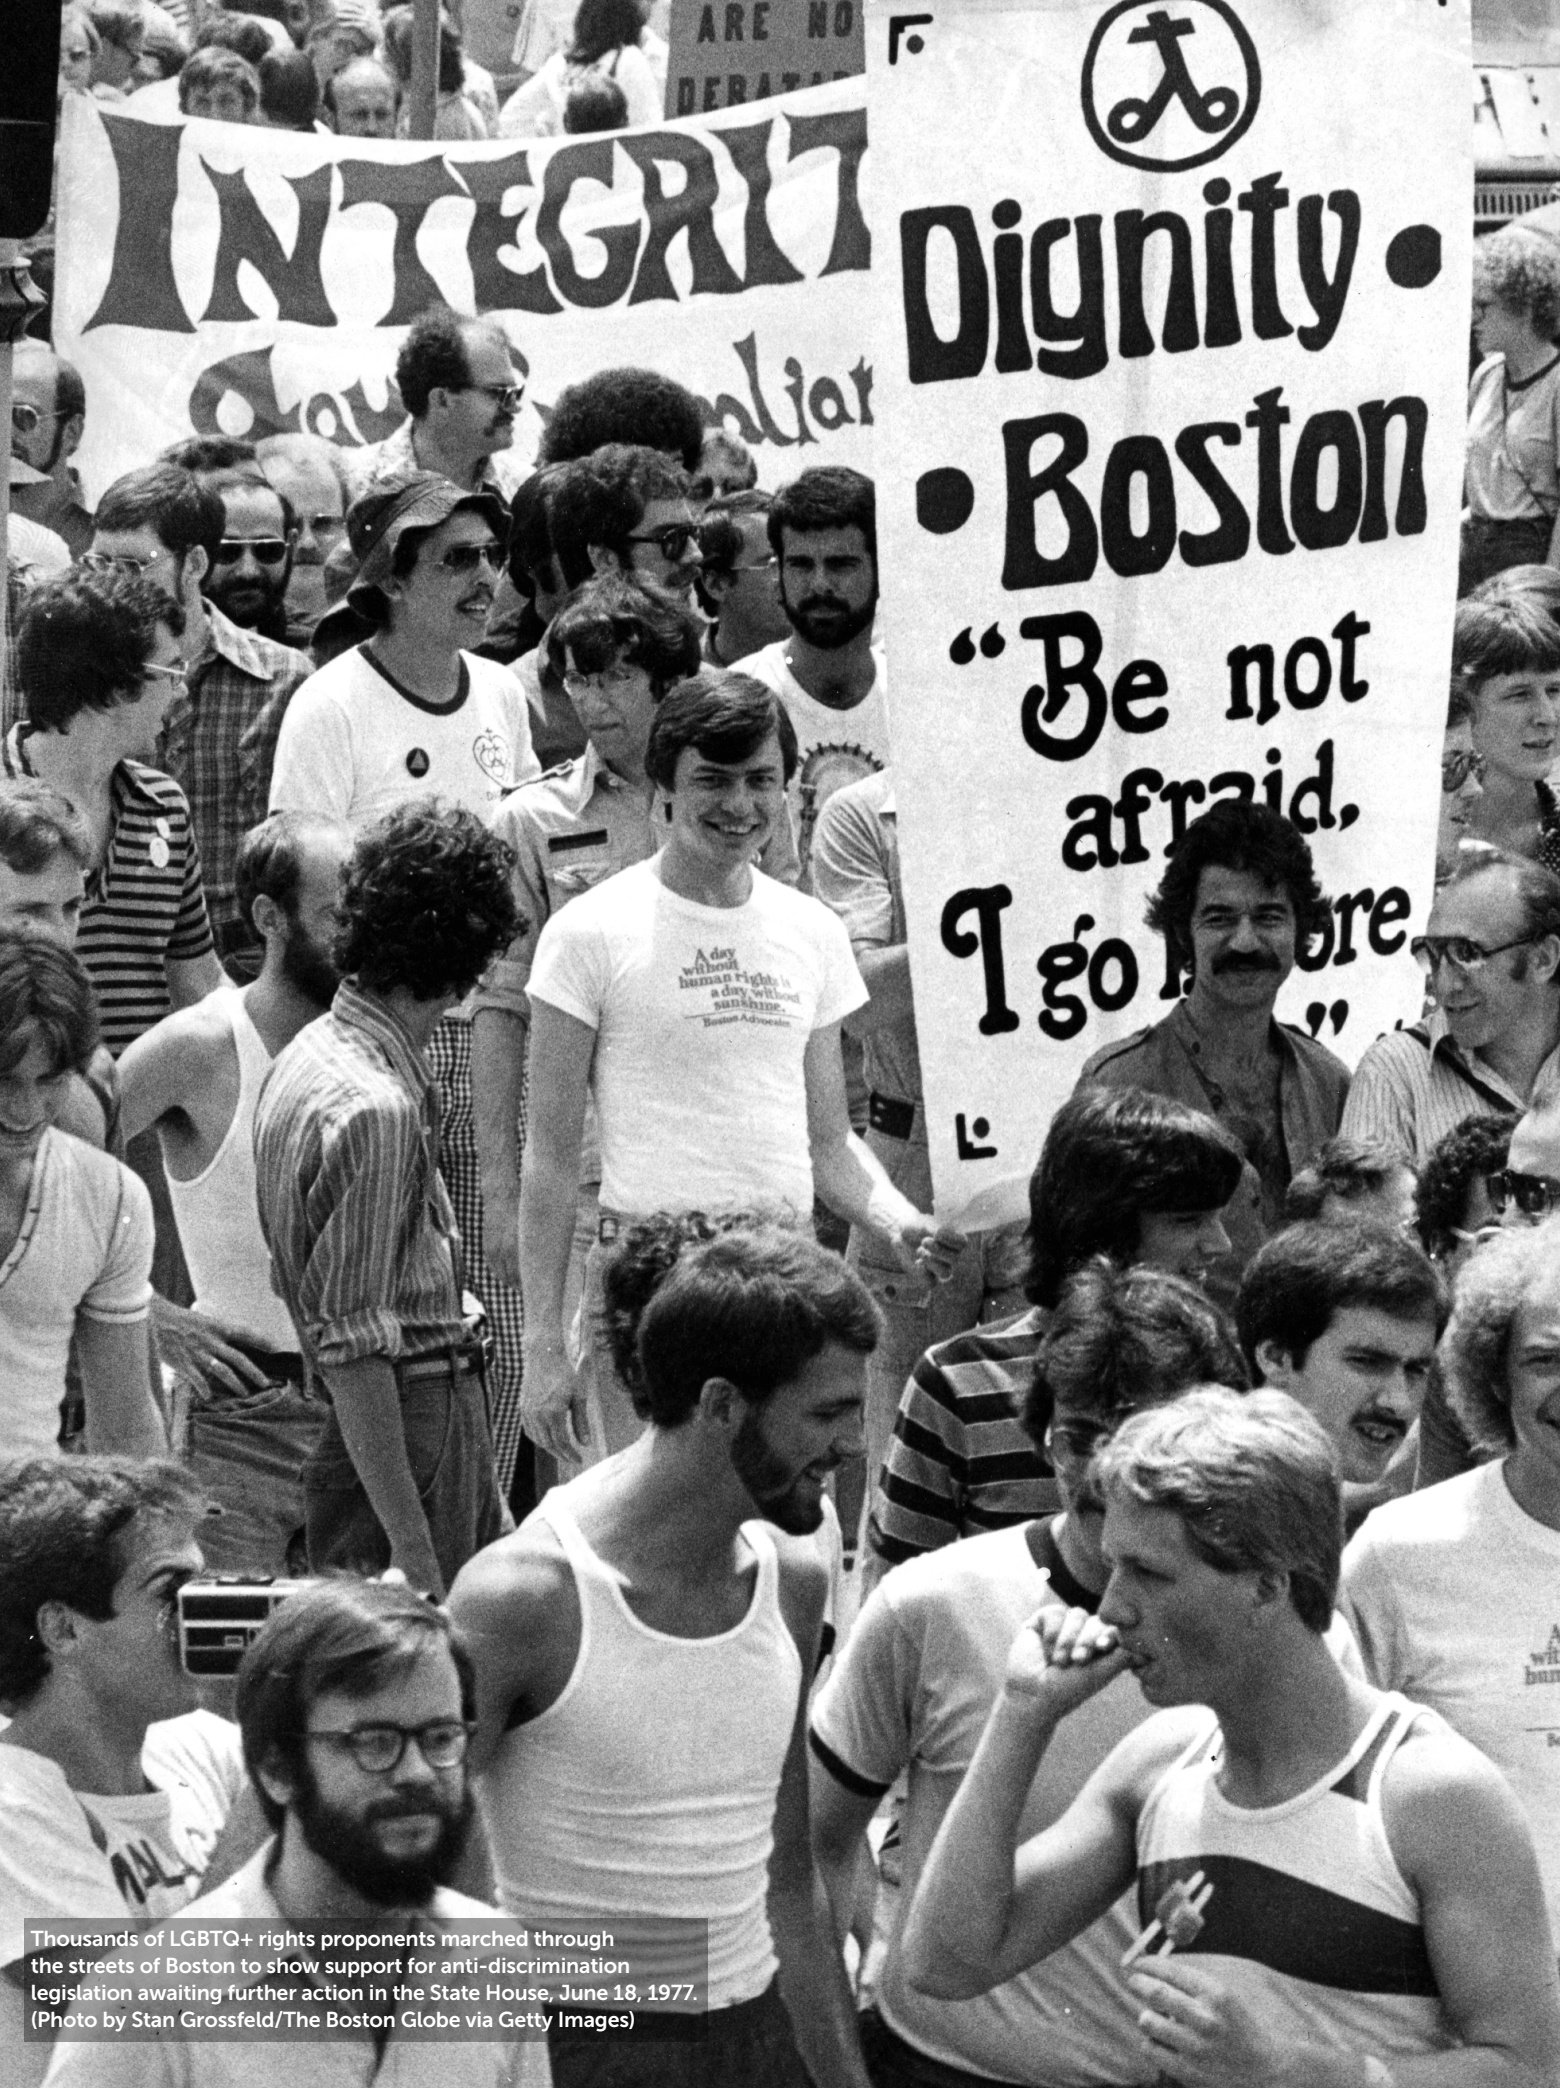

ARE NO  
DEBATE

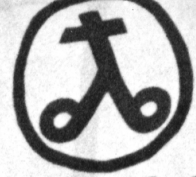

Dignity •  
• Boston  
"Be not  
afraid,  
I go home"

INTEGRITY

A day  
without  
human rights is  
a day without  
sunshine.  
Boston Advocates

Thousands of LGBTQ+ rights proponents marched through the streets of Boston to show support for anti-discrimination legislation awaiting further action in the State House, June 18, 1977. (Photo by Stan Grossfeld/The Boston Globe via Getty Images)
